# Supplementary material
Source: Springer Nature journal article supplement (https://www.springermedizin.de/resource/supplementary/12913_2007_571_MOESM8_ESM.pdf/9535754)

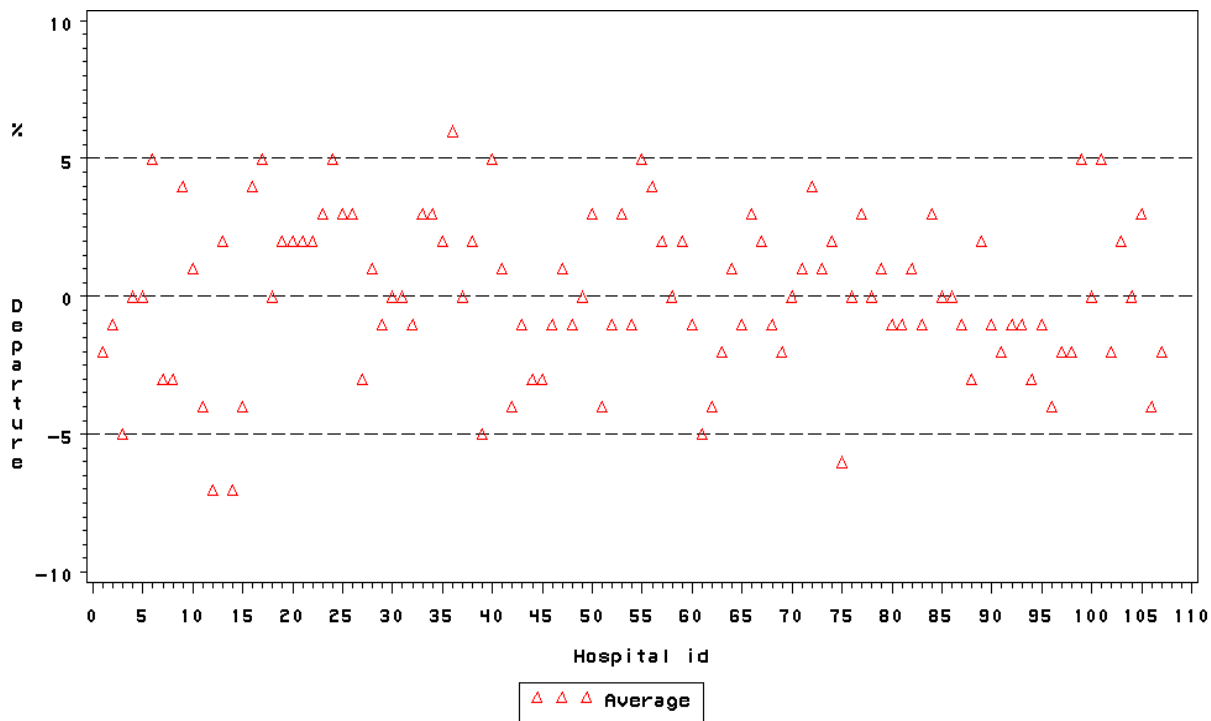

Supplement: MOESM8 [file 9535754]
